# Supplementary material for: A self-healing, adaptive and conductive polymer composite ink for 3D printing of gas sensors
Source: Royal Society of Chemistry journal article supplement (doi:10.1039/c8tc01092g), 2018-01-01
Supplement: c8tc01092g1.pdf [file c8tc01092g1.pdf]

# Self-healing, adaptive and conductive polymer composite ink for 3D printing of gas sensors

*Tongfei Wu<sup>a,b</sup>, Euan Gray<sup>a</sup>, and Biqiong Chen<sup>a,c\*</sup>*

<sup>a</sup>Department of Materials Science and Engineering, University of Sheffield, Mappin Street, Sheffield, S1 3JD, UK.

<sup>b</sup>School of Materials Science and Engineering, Sun Yat-sen University, Guangzhou, 510275, China.

<sup>c</sup>School of Mechanical and Aerospace Engineering, Queen's University Belfast, Stranmillis Road, Belfast BT9 5AH, UK.

## Data fitting

$$y = y_0 + A_1 e^{-t/t_1} + A_2 e^{-t/t_2} \quad (1)$$

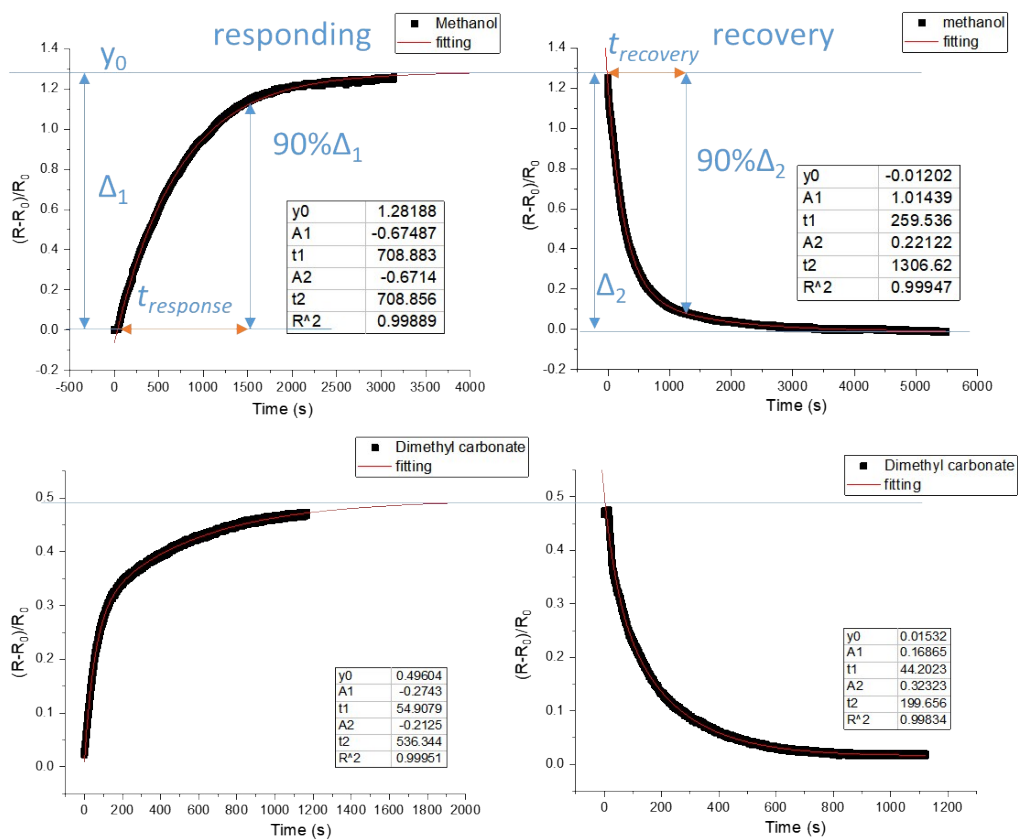

Figure S1. Data fitting results using equation (1). (To be continued)

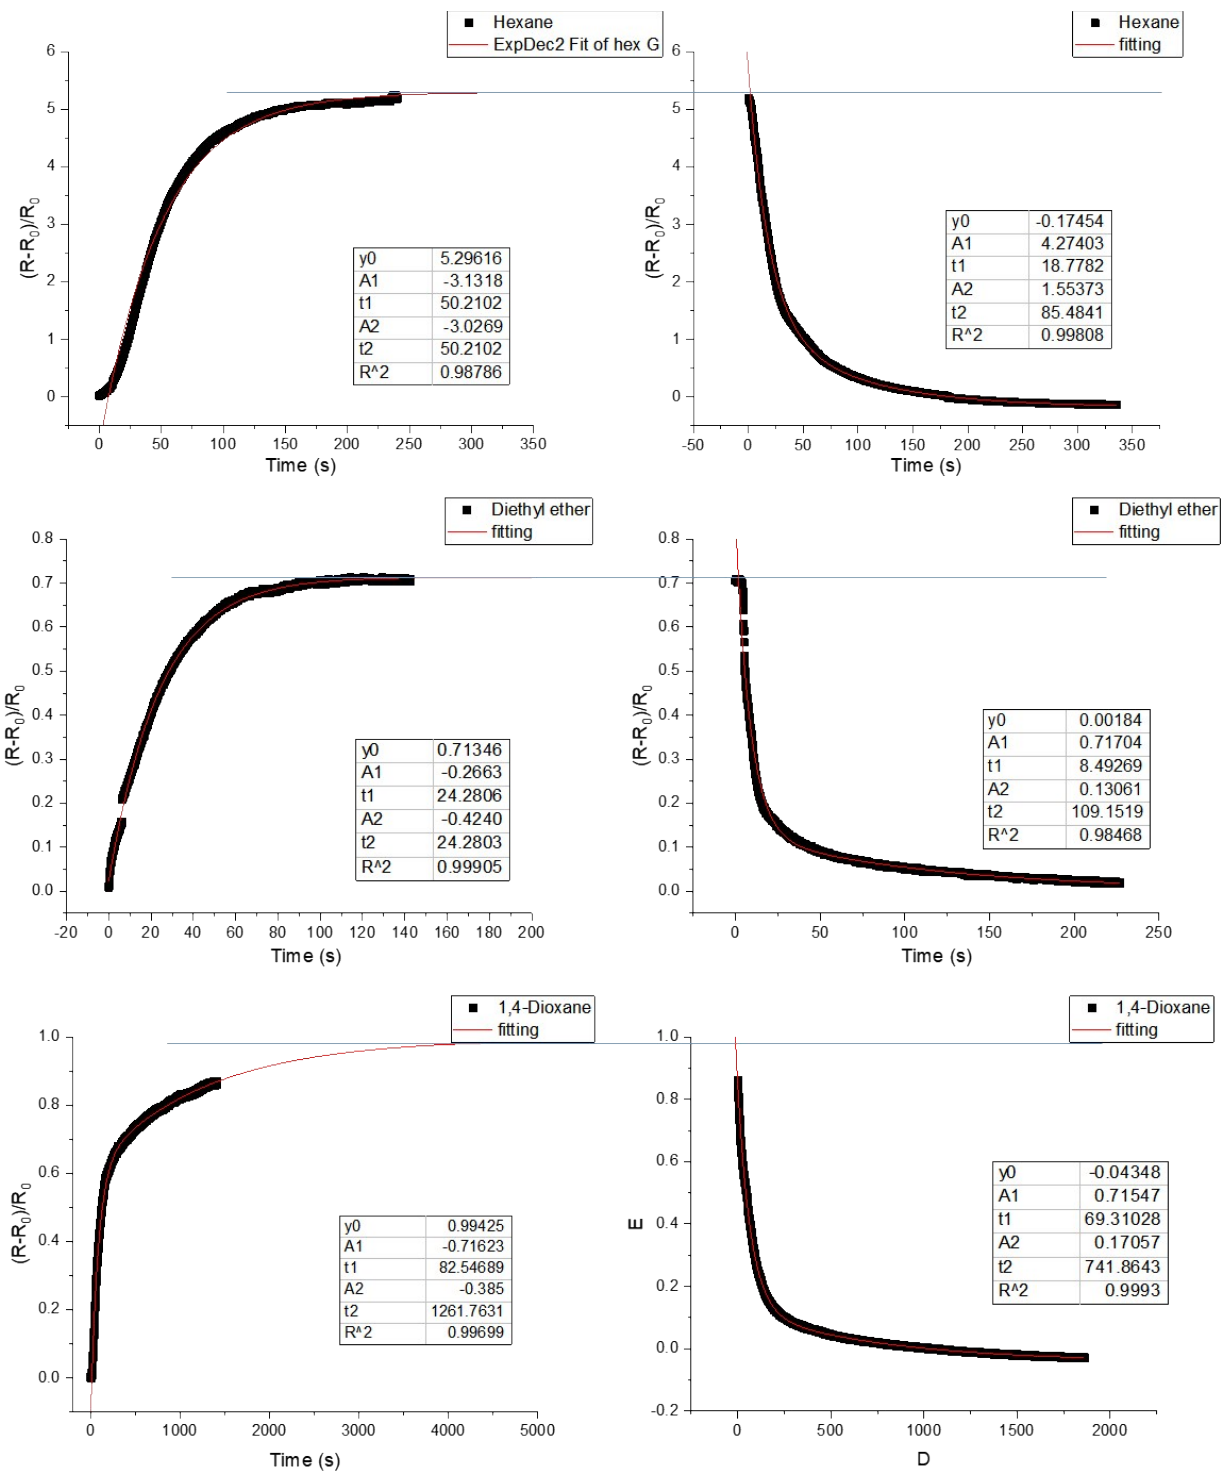

Figure S1. Data fitting results using equation (1). (To be continued)

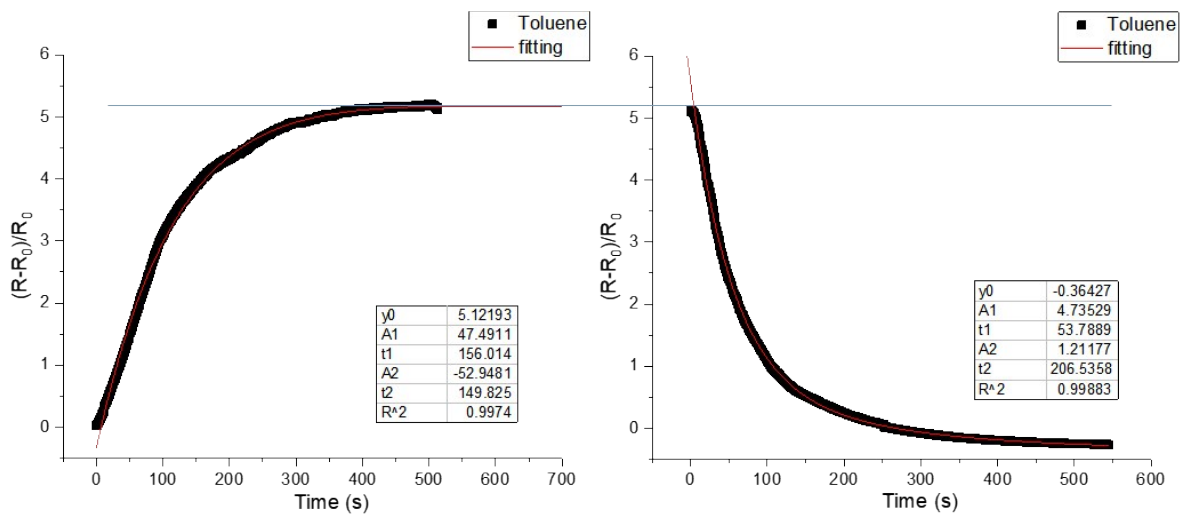

**Figure S1.** Data fitting results using equation (1).
